# Supplementary material
Source: PubMed Central journal article supplement (PMC8081398)
Supplement: mmc1.pdf [file mmc1.pdf]

# THE LANCET

## Supplementary appendix

This translation in French was submitted by the authors and we reproduce it as supplied. It has not been peer reviewed. *The Lancet's* editorial processes have only been applied to the original in English, which should serve as reference for this manuscript.

Cette traduction en français a été proposée par les auteurs et nous l'avons reproduite telle quelle. Elle n'a pas été examinée par des pairs. Les processus éditoriaux du *Lancet* n'ont été appliqués qu'à l'original en anglais et c'est cette version qui doit servir de référence pour ce manuscrit.

Supplement to: Oliu-Barton M, Pradelski BSR, Aghion P, et al. SARS-CoV-2 elimination, not mitigation, creates best outcomes for health, the economy, and civil liberties. *Lancet* 2021; **397**: 2234–36.

## Title

**Éliminer le SRAS-CoV-2, plutôt que de l'atténuer, donne des meilleurs résultats en termes de santé, d'économie et de liberté**

## Text

Différents objectifs stratégiques sont au centre d'un intense débat politique. La santé publique, la croissance économique, la solidarité démocratique et les libertés individuelles sont autant de paramètres à prendre en compte dans l'évaluation des actions de riposte à la COVID-19, et il existe de plus en plus de preuves que ces objectifs n'ont aucunement besoin d'être en conflit. Les pays qui visent systématiquement l'élimination, c'est-à-dire une action maximale et rapide de contrôle du SRAS-CoV-2 et d'arrêt de la transmission communautaire, s'en sortent généralement mieux que les pays qui optent pour l'atténuation, qui consiste à réduire les cas de manière progressive et ciblée sans submerger les systèmes de santé.<sup>1</sup>

Nous avons comparé le nombre de décès dus à la COVID-19, la croissance du produit intérieur brut (PIB) et la rigueur des mesures de confinement pendant la première année de pandémie, dans les pays membres de l'Organisation de coopération et de développement économiques (OCDE) selon qu'ils ont choisi une stratégie d'élimination ou d'atténuation (figure).<sup>2-4</sup> Mais si tous les indicateurs préconisent l'élimination, notre analyse ne prouve toutefois pas l'existence d'un lien de causalité entre les choix stratégiques et les résultats. Les décès pour 1 million d'habitants dus au COVID-19 dans les pays qui ont opté pour l'élimination du virus (Australie, Islande, Japon, Nouvelle Zélande et Corée du Sud) ont été 25 fois plus faibles que dans les pays qui ont favorisé l'atténuation (figure). La mortalité est un bon indicateur de la charge de morbidité générale d'un pays. Les décideurs devraient aussi tenir compte des preuves, toujours plus nombreuses, de morbidité à long terme après l'infection par le SRAS-CoV-2.<sup>5</sup>

En termes économiques, la supériorité de l'élimination fait aussi de plus en plus consensus.<sup>6</sup> Une étude a quantifié le nombre de reproduction de base optimal pour que l'élimination soit réalisée à un coût économique minimal.<sup>7</sup> À cette fin, nous comparons la croissance hebdomadaire du PIB par rapport à celle de 2019 pour les pays de l'OCDE qui ont choisi l'élimination ou l'atténuation (figure). L'élimination conduit en moyenne et pendant presque toutes les périodes à de meilleurs résultats de croissance du PIB que l'atténuation. Si la croissance du PIB a retrouvé son niveau antérieur à la pandémie début 2021 dans les cinq pays qui ont fait le choix de l'élimination, elle reste négative dans les 32 autres pays de l'OCDE.

Malgré ses bénéfices sur le plan sanitaire et économique, la stratégie d'élimination, jugée trop liberticide, a fait l'objet de nombreuses critiques. En procédant à l'analyse de l'indice de rigueur mis au point par des chercheurs de l'université d'Oxford, notre étude postule pourtant le contraire.<sup>2</sup> Cet indice mesure la sévérité des restrictions, et combine pour cela huit indicateurs concernant les politiques de confinement et de fermeture, huit indicateurs liés aux politiques de santé, et un indicateur lié aux campagnes d'information publique.<sup>2</sup> Parmi les pays de l'OCDE, c'est dans ceux qui ont opté pour l'atténuation que les libertés ont été les plus atteintes, tandis que les mesures de confinement précoces, prises en vue de l'élimination, se sont avérées moins strictes car plus brèves (figure). Souvent, l'élimination a été présentée comme une approche de solidarité civique gage de rétablissement rapide

des libertés individuelles. Cet accent mis sur l'objectif commun est souvent négligé dans le débat politique.

On constate que les pays qui ont opté pour une action stricte et rapide visant à éliminer le SRAS-CoV-2, avec une bonne coopération de leur population, ont mieux protégé leur économie et leur santé, tout en minimisant les restrictions des libertés individuelles par rapport à ceux qui s'efforcent d'atténuer la propagation du virus. La vaccination de masse contre la COVID-19 sera essentielle au retour à la vie normale. Néanmoins, compter uniquement sur la vaccination pour contrôler la pandémie est un pari risqué en raison des inégalités en matière de déploiement et d'administration, de la période d'immunité limitée et de l'émergence de nouveaux variants du SRAS-CoV-2.<sup>8,9</sup> L'Histoire montre que la vaccination ne peut juguler ni seule ni rapidement une épidémie et qu'une combinaison de mesures de santé publique est nécessaire. Cela a été le cas, par exemple, pour la variole : son éradication a nécessité des efforts concertés des décennies durant, alliant la vaccination, la communication et l'implication du public, et des mesures de dépistage et d'isolement.<sup>10</sup> Même à la fin des campagnes de vaccination, ces mesures de santé publique doivent être maintenues dans une certaine mesure, faute de quoi de nouvelles vagues d'infections pourraient générer une morbidité et une mortalité accrues.<sup>11</sup> La prolifération de nouveaux variants du SRAS-CoV-2 suscitant de nombreuses préoccupations, de nombreux scientifiques appellent à une stratégie internationale coordonnée pour éliminer le virus.<sup>12-15</sup> En outre, le gouvernement américain a en outre déclaré en avril 2021 que mettre un terme à la COVID-19 était sa priorité numéro un, soulignant au passage que « cette pandémie ne prendra fin aux États-Unis que lorsqu'elle aura pris fin dans le monde entier ».<sup>16</sup>

L'action nationale seule s'avère insuffisante et doit s'accompagner d'un plan de sortie de crise international clair. Les pays qui choisissent de « vivre avec le virus » constitueront probablement une menace pour les autres, notamment ceux dont l'accès aux vaccins contre la COVID-19 est limité. L'incertitude quant au moment, à la durée et à la rigueur des mesures de confinement étouffera la croissance économique, car les entreprises retiendront leurs investissements et la confiance des consommateurs se détériorera. Le commerce et les déplacements internationaux continueront d'en pâtir. L'indécision politique et les décisions partisans nuisent la confiance dans les pouvoirs publics, ce qui n'est pas de bon augure pour les pays dont l'indice de démocratie s'est détérioré pendant la crise.<sup>17</sup> Quant aux pays ayant fait le choix de l'élimination, ils pourront revenir à une situation quasi normale : ils peuvent relancer leur économie, autoriser la libre circulation entre les zones vertes,<sup>18</sup> et même soutenir les autres pays, par exemple en matière de vaccination. Cette solidarité est particulièrement importante pour les pays les plus pauvres qui, faute d'action, resteront sur la touche. L'accès limité aux vaccins et l'absence de filets de sécurité sociale pour faire face aux mesures de confinement réduisent leurs perspectives de sortie de la pandémie. Il est de notre devoir moral de contribuer à mettre fin à cette pandémie à l'échelle mondiale, et les pays qui prendront le leadership gagneront en influence géopolitique. Car les conséquences des différentes mesures prises par les pouvoirs publics face à la COVID-19 seront durables et se prolongeront bien après la fin de la pandémie.

### Competing interests

IK est membre du Global Preparedness Monitoring Board. JVL est membre du Lancet COVID-19 Commission Public Health Taskforce. DS est membre du Scottish COVID-19 Advisory Group et du UK Cabinet Office COVID-19 Advisory Group. SV est membre du Team Halo (London School of Hygiene &

Tropical Medicine, l'UN, et Gavi, the Vaccine Alliance). Tous les autres auteurs déclarent n'avoir aucun conflit d'intérêt.

## Authors

Miquel Oliu-Barton, \*Bary S R Pradelski, Philippe Aghion, Patrick Artus, Ilona Kickbusch, Jeffrey V Lazarus, Devi Sridhar, Samantha Vanderslott

[bary.pradelski@cns.fr](mailto:bary.pradelski@cns.fr)

## Affiliations

Université Paris Dauphine–PSL, Paris, France (MO-B); Esade Centre for Economic Policy, Barcelona, Espagne (MO-B); Centre national de la recherche scientifique (CNRS), CS 40700, 38058 Grenoble cedex 9, France (BSRP); Oxford-Man Institute of Quantitative Finance, University of Oxford, Oxford, UK (BSRP); Collège de France, Paris, France (PAg); London School of Economics and Political Science, Londres, UK (PAg); INSEAD, Fontainebleau, France (PAg); Natixis, Paris, France (PAr); Paris School of Economics, Paris, France (PAr); Global Health Centre, Graduate Institute of International and Development Studies, Genève, Suisse (IK); Barcelona Institute for Global Health (ISGlobal), Hospital Clínic, University of Barcelona, Barcelone, Espagne (JVL); Global Health Governance Programme, Usher Institute of Population Health Sciences and Informatics and College of Medicine and Veterinary Medicine, University of Edinburgh, Edinburgh, UK (DS); Oxford Vaccine Group, Centre for Clinical Vaccinology and Tropical Medicine, University of Oxford, Oxford, UK (SV)

## References

- 1 Baker MG, Wilson N, Blakely T. Elimination could be the optimal response strategy for Covid-19 and other emerging pandemic diseases. *BMJ* 2020; **371**: m4907.
- 2 Hale T, Angrist N, Goldszmidt R, et al. A global panel database of pandemic policies (Oxford COVID-19 government response tracker). *Nat Hum Behav* 2021; **5**: 529–38.
- 3 Roser M, Ritchie H, Ortiz-Ospina E, et al. Coronavirus pandemic (COVID-19). Our World in Data. <https://ourworldindata.org/coronavirus> (accessed April 21, 2021).
- 4 Woloszko N. Tracking activity in real time with Google Trends. OECD Economics Department Working Papers 2020, no 1634. Paris: OECD, 2020.
- 5 Taquet M, Geddes JR, Husain M, et al. 6-month neurological and psychiatric outcomes in 236 379 survivors of COVID-19: a retrospective cohort study using electronic health records. *Lancet Psychiatry* 2021; published April 6. [https://doi.org/10.1016/S2215-0366\(21\)00084-5](https://doi.org/10.1016/S2215-0366(21)00084-5).
- 6 Chetty R, Friedman JN, Hendren N, et al. The economic impacts of COVID-19: evidence from a new public database built using private sector data. Working paper no 27431. Cambridge, MA: National Bureau of Economic Research, 2020.
- 7 Dorn F, Khailaie S, Stoeckli M, et al. The common interests of health protection and the economy: evidence from scenario calculations of COVID-19 containment policies. *medRxiv* 2020; published online Aug 16. <https://doi.org/10.1101/2020.08.14.20175224> (preprint).
- 8 Aschwanden C. Five reasons why COVID herd immunity is probably impossible. *Nature* 2021; **591**: 520–22.
- 9 Freeman D, Loe B, Chadwick A, et al. COVID-19 vaccine hesitancy in the UK: The Oxford Coronavirus Explanations, Attitudes, and Narratives Survey (Oceans) II. *Psychol Med* 2020; published online Dec 11. <https://doi.org/10.1017/S0033291720005188>.

- 10 Bhattacharya S. Reflections on the eradication of smallpox. *Lancet* 2010; **375**: 1602–03.
- 11 Moore S, Hill EM, Tildesley MJ, et al. Vaccination and non-pharmaceutical interventions for COVID-19: a mathematical modelling study. *Lancet Infect Dis* 2021; published online March 18. [https://doi.org/10.1016/S1473-3099\(21\)00143-2](https://doi.org/10.1016/S1473-3099(21)00143-2).
- 12 Priesemann V, Brinkmann MM, Ciesek S, et al. Calling for pan-European commitment for rapid and sustained reduction in SARS-CoV-2 infections. *Lancet* 2021; **397**: 92–93.
- 13 Priesemann V, Balling R, Brinkman MM, et al. An action plan for pan-European defence against new SARS-CoV-2 variants. *Lancet* 2021; **397**: 469–70.
- 14 Oliu-Barton M, Pradelski B, Wolff GB, et al. Aiming for zero COVID-19: Europe needs to take action. 2021. <http://www.covid-greenzone.com> (accessed April 26, 2021).
- 15 Fontanet A, Autran B, Lina B, et al. SARS-CoV-2 variants and ending the COVID-19 pandemic. *Lancet* 2021; **397**: 952–54.
- 16 Blinken AJ. Secretary Antony J. Blinken remarks to the press on the COVID response. US Department of State. April 5, 2021. <https://www.state.gov/secretary-antony-j-blinken-remarks-to-the-press-on-the-covid-response/> (accessed April 21, 2021).
- 17 Bollyky TJ, Kickbusch I. Preparing democracies for pandemics. *BMJ* 2020; **371**: m4088.
- 18 Pradelski B, Oliu-Barton M. Green bridges: reconnecting Europe to avoid economic disaster. In: Bénassy-Quéré A, Weder di Mauro B, eds. *Europe in the time of Covid-19*. London: CEPR Press, 2020: 83–87.

#### Figure caption

**Figure :** Comparaison du nombre de décès dus à la COVID-19, de la croissance du PIB et de la rigueur des mesures de confinement dans les pays de l'OCDE privilégiant l'élimination et dans ceux privilégiant l'atténuation du SRAS-CoV-2. Les pays de l'OCDE qui privilégient l'élimination sont l'Australie, la Corée du Sud, l'Islande, le Japon et la Nouvelle-Zélande. Les pays de l'OCDE qui privilégient l'atténuation sont l'Allemagne, l'Autriche, la Belgique, le Canada, le Chili, la Colombie, le Danemark, l'Espagne, l'Estonie, les États-Unis, la Finlande, la France, la Grèce, la Hongrie, l'Irlande, Israël, l'Italie, la Lettonie, la Lituanie, le Luxembourg, le Mexique, la Norvège, les Pays-Bas, la Pologne, le Portugal, la République tchèque, le Royaume-Uni, la Slovaquie, la Slovénie, la Suède, la Suisse et la Turquie. Les données sur la rigueur des mesures de confinement proviennent du dispositif de suivi « Oxford COVID-19 government response tracker ». <sup>2</sup> Les données sur les décès COVID-19 proviennent de Our World in Data. <sup>3</sup> Les données sur la croissance du PIB proviennent de l'indicateur hebdomadaire d'activité de l'OCDE. <sup>4</sup> PIB = produit intérieur brut. OCDE = Organisation de coopération et de développement économiques.
