# Supplementary material
Source: PubMed Central journal article supplement (PMC8081398)
Supplement: mmc2.pdf [file mmc2.pdf]

# THE LANCET

## Supplementary appendix

This translation in Spanish was submitted by the authors and we reproduce it as supplied. It has not been peer reviewed. *The Lancet's* editorial processes have only been applied to the original in English, which should serve as reference for this manuscript.

Los autores nos proporcionaron esta traducción al español y la reproducimos tal como nos fue entregada. No la hemos revisado. Los procesos editoriales de *The Lancet* se han aplicado únicamente al original en inglés, que debe servir de referencia para este manuscrito.

Supplement to: Oliu-Barton M, Pradelski BSR, Aghion P, et al. SARS-CoV-2 elimination, not mitigation, creates best outcomes for health, the economy, and civil liberties. *Lancet* 2021; **397**: 2234–36.

## Title

**La eliminación del SARS-CoV-2, y no su mitigación, genera más beneficios en lo que respecta a la salud, economía y libertades civiles**

## Text

El equilibrio entre distintos objetivos está en el corazón de la toma de decisiones políticas. Salud pública, crecimiento económico, solidaridad democrática y libertades civiles son factores importantes a la hora de evaluar las respuestas a la pandemia. Existen pruebas evidentes de que estos objetivos no tienen por qué estar necesariamente en conflicto. Los países que sistemáticamente han tenido como objetivo la eliminación de la pandemia, definiendo acciones excepcionales para controlar el SARS-CoV-2 y para detener la transmisión comunitaria lo más rápido posible, han obtenido mejores resultados que los que han optado por la mitigación mediante una acción incremental con criterios escalonados o acciones específicas destinadas a reducir los casos para no saturar los sistemas de salud<sup>1</sup>.

Hemos comparado las muertes por COVID-19, el crecimiento del producto interior bruto (PIB) y el rigor de las medidas de confinamiento de los países de la OCDE que buscaron la eliminación con los mismos indicadores de los países que optaron por la mitigación (gráfico)<sup>2-4</sup>. Aunque todos los indicadores favorecen la eliminación, nuestro análisis no prueba la existencia de una relación causal entre las distintas estrategias de respuesta a la pandemia y los diferentes resultados. La tasa de mortalidad de la COVID-19 por 1 millón de habitantes en los países de la OCDE que optaron por la eliminación (Australia, Islandia, Japón, Nueva Zelanda y Corea del Sur) ha sido alrededor de 25 veces menor que en los países de la OCDE que optaron por adoptar medidas de mitigación (gráfico). La mortalidad es una variable proxy que permite evaluar el impacto de la enfermedad en un país de un modo más amplio. Por ejemplo, las autoridades deberían tener en cuenta los crecientes indicios de morbilidad a largo plazo después de infección por SARS-CoV-2<sup>5</sup>.

Asimismo, existe un consenso cada vez mayor sobre los beneficios de la estrategia de eliminación, en detrimento de la mitigación, por lo que respecta a los resultados económicos (desempeño económico) de un país<sup>6</sup>. Un estudio cuantificó el número base de reproducción para alcanzar la eliminación con el mínimo coste económico<sup>7</sup>. Con este objetivo, se consideró el crecimiento semanal del PIB con respecto a 2019 en los países de la OCDE que optaron por la eliminación y no por la mitigación (gráfico). De promedio, en todos los períodos analizados, la eliminación logra mejores resultados que la mitigación en términos de crecimiento del PIB. El crecimiento del PIB volvió a los niveles pre-pandemia a comienzos de 2021 en los 5 países que optaron por la eliminación, mientras que el crecimiento sigue siendo negativo en los otros 32 países de la OCDE.

Más allá de sus ventajas en términos de salud y economía, la estrategia de eliminación ha sido criticada por restringir las libertades civiles. El argumento es cuestionable si analizamos el índice de rigurosidad que han desarrollado los investigadores de la Universidad de Oxford. Este índice mide la rigurosidad de las políticas de confinamiento que restringen principalmente la conducta de la gente mediante la combinación de 8 indicadores de políticas de restricción (contención) y cierre, 8 indicadores de políticas sanitarias y 1 indicador de las campañas de información pública. Entre los países de la OCDE, las libertades se restringieron de un modo más severo en países que optaron por la mitigación, mientras que la adopción inmediata de medidas de confinamiento —de acuerdo con el criterio de eliminación— fue menos estricta y de más corta duración (gráfico). Lo más importante es que la eliminación ha sido considerada como una estrategia de solidaridad ciudadana para restaurar las libertades civiles lo antes posible; en el debate público no suele ponerse el foco en este objetivo común y compartido.

Los hechos demuestran que los países que optan por actuar rápidamente para eliminar el SARS-CoV-2, con el apoyo generalizado de sus habitantes, también protegen mejor sus economías y minimizan las restricciones sobre las libertades civiles en comparación con aquellos que se empeñan en implantar una estrategia de mitigación. En clave de futuro, la vacunación masiva de la COVID-19 será determinante para volver a la normalidad, pero fiarlo todo a las vacunas para controlar la pandemia es un riesgo debido a su desigual implementación y aceptación, al tiempo limitado de inmunidad y a la aparición de nuevas variantes de SARS-CoV-2<sup>8,9</sup>. La historia demuestra que la vacunación no puede controlar un virus rápidamente y sin ayuda: son necesarias una combinación de medidas de salud pública. La erradicación de la viruela requirió esfuerzos coordinados durante décadas, incluida la vacunación, la comunicación y el compromiso social, y la aplicación de medidas de test, rastreo y aislamiento<sup>10</sup>. Estas medidas de salud pública deben mantenerse en cierta medida incluso después de las campañas de vacunación; en caso contrario, nuevas olas de infecciones podrían llevar al incremento de la morbilidad y mortalidad<sup>11</sup>. Con la proliferación de las nuevas variantes de SARS-CoV-2, que son motivo de preocupación, muchos científicos están haciendo un llamamiento para consensuar una estrategia internacional que elimine el SARS-CoV-2<sup>12-15</sup>. Es más, el Departamento de Estado de los Estados Unidos declaró en abril de 2021 que frenar la COVID-19 es la prioridad número uno de la administración Biden-Harris, y subrayó que «la pandemia no terminará a nivel nacional hasta que no termine a nivel mundial»<sup>16</sup>.

Las acciones que pueda llevar a cabo una nación (por sí sola) son insuficientes: para salir de la pandemia se necesita un plan específico a nivel global. Los países que opten por convivir con el virus probablemente supondrán un riesgo para los demás, especialmente para aquellos que tienen menos acceso a las vacunas de la COVID-19. La incertidumbre por la duración y severidad de los confinamientos supondrá un freno al crecimiento económico en la medida en que las empresas retendrán las inversiones y la confianza de los consumidores se deteriorará. El comercio global y el turismo se continuarán viendo afectados. La indecisión política y la adopción de políticas partidistas hacen que la confianza

en el gobierno disminuya. Esto no augura nada bueno para los países que han experimentado un retroceso en su democracia<sup>17</sup>. Mientras tanto, es probable que los países que opten por la eliminación regresen a un estado prácticamente de normalidad: podrán recuperar sus economías, permitir los viajes entre zonas verdes<sup>18</sup> y ayudar a otros países en sus campañas de vacunación o en otros ámbitos. Las consecuencias de las distintas respuestas gubernamentales a la COVID-19 serán de larga duración y se extenderán más allá del fin de la pandemia. Los primeros avances económicos y políticos que han logrado los países partidarios de eliminar el SARS-CoV-2 probablemente darán sus frutos a largo plazo.

### Competing interests

IK es miembro del Global Preparedness Monitoring Board. JVL es miembro del Lancet COVID-19 Commission Public Health Taskforce. DS es miembro del Scottish COVID-19 Advisory Group y del UK Cabinet Office COVID-19 Advisory Group. SV es miembro del Team Halo (London School of Hygiene & Tropical Medicine, l'UN, y Gavi, la Alianza para la Vacunación). Todos los demás autores declaran no tener ningún conflicto de interés.

### Authors

*Miquel Oliu-Barton, \*Bary S R Pradeliski, Philippe Aghion, Patrick Artus, Ilona Kickbusch, Jeffrey V Lazarus, Devi Sridhar, Samantha Vanderslott*  
[bary.pradeliski@cnrs.fr](mailto:bary.pradeliski@cnrs.fr)

### Affiliations

Université Paris Dauphine–PSL, París, Francia (MO-B); Esade Centre for Economic Policy, Barcelona, España (MO-B); Centre national de la recherche scientifique (CNRS), CS 40700, 38058 Grenoble cedex 9, Francia (BSRP); Oxford-Man Institute of Quantitative Finance, University of Oxford, Oxford, UK (BSRP); Collège de France, París, Francia (PAg); London School of Economics and Political Science, Londres, UK (PAg); INSEAD, Fontainebleau, Francia (PAg); Natixis, París, Francia (PAr); Paris School of Economics, París, Francia (PAr); Global Health Centre, Graduate Institute of International and Development Studies, Ginebra, Suiza (IK); Barcelona Institute for Global Health (ISGlobal), Hospital Clínic, University of Barcelona, Barcelona, España (JVL); Global Health Governance Programme, Usher Institute of Population Health Sciences and Informatics and College of Medicine and Veterinary Medicine, University of Edinburgh, Edinburgo, UK (DS); Oxford Vaccine Group, Centre for Clinical Vaccinology and Tropical Medicine, University of Oxford, Oxford, UK (SV)

### References

- 1 Baker MG, Wilson N, Blakely T. Elimination could be the optimal response strategy for Covid-19 and other emerging pandemic diseases. *BMJ* 2020; **371**: m4907.
- 2 Hale T, Angrist N, Goldszmidt R, et al. A global panel database of pandemic policies (Oxford COVID-19 government response tracker). *Nat Hum Behav* 2021; **5**: 529–38.
- 3 Roser M, Ritchie H, Ortiz-Ospina E, et al. Coronavirus pandemic (COVID-19). Our World in Data. <https://ourworldindata.org/coronavirus> (accessed April 21, 2021).
- 4 Woloszko N. Tracking activity in real time with Google Trends. OECD Economics Department Working Papers 2020, no 1634. Paris: OECD, 2020.
- 5 Taquet M, Geddes JR, Husain M, et al. 6-month neurological and psychiatric outcomes in 236 379 survivors of COVID-19: a retrospective cohort study using electronic health records. *Lancet Psychiatry* 2021; published April 6. [https://doi.org/10.1016/S2215-0366\(21\)00084-5](https://doi.org/10.1016/S2215-0366(21)00084-5).
- 6 Chetty R, Friedman JN, Hendren N, et al. The economic impacts of COVID-19: evidence from a new public database built using private sector data. Working paper no 27431. Cambridge, MA: National Bureau of Economic Research, 2020.
- 7 Dorn F, Khailaie S, Stoeckli M, et al. The common interests of health protection and the economy: evidence from scenario calculations of COVID-19 containment policies. *medRxiv* 2020; published online Aug 16. <https://doi.org/10.1101/2020.08.14.20175224> (preprint).
- 8 Aschwanden C. Five reasons why COVID herd immunity is probably impossible. *Nature* 2021; **591**: 520–22.
- 9 Freeman D, Loe B, Chadwick A, et al. COVID-19 vaccine hesitancy in the UK: The Oxford Coronavirus Explanations, Attitudes, and Narratives Survey (Oceans) II. *Psychol Med* 2020; published online Dec 11. <https://doi.org/10.1017/S0033291720005188>.
- 10 Bhattacharya S. Reflections on the eradication of smallpox. *Lancet* 2010; **375**: 1602–03.
- 11 Moore S, Hill EM, Tildesley MJ, et al. Vaccination and non-pharmaceutical interventions for COVID-19: a mathematical modelling study. *Lancet Infect Dis* 2021; published online March 18. [https://doi.org/10.1016/S1473-3099\(21\)00143-2](https://doi.org/10.1016/S1473-3099(21)00143-2).
- 12 Priesemann V, Brinkmann MM, Ciesek S, et al. Calling for pan-European commitment for rapid and sustained reduction in SARS-CoV-2 infections. *Lancet* 2021; **397**: 92–93.
- 13 Priesemann V, Balling R, Brinkman MM, et al. An action plan for pan-European defence against new SARS-CoV-2 variants. *Lancet* 2021; **397**: 469–70.
- 14 Oliu-Barton M, Pradeliski B, Wolff GB, et al. Aiming for zero COVID-19: Europe needs to take action. 2021. <http://www.covid-greenzone.com> (accessed April 26, 2021).
- 15 Fontanet A, Autran B, Lina B, et al. SARS-CoV-2 variants and ending the COVID-19 pandemic. *Lancet* 2021; **397**: 952–54.
- 16 Blinken AJ. Secretary Antony J. Blinken remarks to the press on the COVID response. US Department of State. April 5, 2021. <https://www.state.gov/secretary-antony-j-blinken-remarks-to-the-press-on-the-covid-response/> (accessed April 21, 2021).
- 17 Bollyky TJ, Kickbusch I. Preparing democracies for pandemics. *BMJ* 2020; **371**: m4088.
- 18 Pradeliski B, Oliu-Barton M. Green bridges: reconnecting Europe to avoid economic disaster. In: Bénassy-Quéré A, Weder di Mauro B, eds. Europe in the time of Covid-19. London: CEPR Press, 2020: 83–87.

## Figure caption

**Gráfico:** Comparación del número de muertes por COVID-19, del crecimiento del PIB y del rigor de las medidas de confinamiento en los países de la OCDE que privilegiaron la

eliminación y en los que privilegiaron la mitigación del SARS-CoV-2. Los países de la OCED que privilegiaron la eliminación son Australia, Corea del Sur, Islandia, Japón y Nueva Zelanda. Los países de la OCDE que privilegiaron la mitigación son Alemania, Austria, Bélgica, Canadá, Chile, Colombia, Dinamarca, España, Estonia, Estados Unidos, Finlandia, Francia, Grecia, Hungría, Irlanda, Israel, Italia, Letonia, Lituania, Luxemburgo, México, Noruega, Holanda, Polonia, Portugal, República Checa, Reino Unido, Eslovaquia, Eslovenia, Suecia, Suiza y Turquía. Los datos sobre el rigor de las medidas de confinamiento provienen del dispositivo de seguimiento «Oxford COVID-19 government response tracker»<sup>2</sup>. Los datos sobre mortalidad por COVID-19 provienen de *Our World in Data*<sup>3</sup>. Los datos sobre el crecimiento del PIB provienen del indicador semanal de actividad de la OCDE<sup>4</sup>. PIB = producto interior bruto. OCDE = Organización para la Cooperación y de Desarrollo Económicos.
